# Supplementary material
Source: PubMed Central journal article supplement (PMC2765091)
Supplement: 0907455106_ST1_PDF.pdf [file 0907455106_ST1_PDF.pdf]

**SI Table 1: Thermodynamic parameters for equilibrium unfolding of CTPRa proteins fitted to Two State Model.**

| CTPRan | GuHCl / Circular dichroism |                                                             |                                                     | GuHCl / Fluorescence      |                                                             |                                                     | Averaged Values from GuHCl denaturations |                                                                |                                                     | Urea / Circular dichroism    |                                                                |                                                     |
|--------|----------------------------|-------------------------------------------------------------|-----------------------------------------------------|---------------------------|-------------------------------------------------------------|-----------------------------------------------------|------------------------------------------|----------------------------------------------------------------|-----------------------------------------------------|------------------------------|----------------------------------------------------------------|-----------------------------------------------------|
|        | [D] <sub>50%</sub><br>(M)  | <i>m</i> -value<br>(kcalmol <sup>-1</sup> M <sup>-1</sup> ) | $\Delta G_{D-N}^{H_2O}$<br>(kcalmol <sup>-1</sup> ) | [D] <sub>50%</sub><br>(M) | <i>m</i> -value<br>(kcalmol <sup>-1</sup> M <sup>-1</sup> ) | $\Delta G_{D-N}^{H_2O}$<br>(kcalmol <sup>-1</sup> ) | <[D] <sub>50%</sub> ><br>(M)             | < <i>m</i> >-value<br>(kcalmol <sup>-1</sup> M <sup>-1</sup> ) | $\Delta G_{D-N}^{H_2O}$<br>(kcalmol <sup>-1</sup> ) | <[D] <sub>50%</sub> ><br>(M) | < <i>m</i> >-value<br>(kcalmol <sup>-1</sup> M <sup>-1</sup> ) | $\Delta G_{D-N}^{H_2O}$<br>(kcalmol <sup>-1</sup> ) |
| 2      | 1.7 ± 0.04                 | 2.1 ± 0.2                                                   | 3.5 ± 0.3                                           | 1.6 ± 0.04                | 2.1 ± 0.2                                                   | 3.4 ± 0.3                                           | 1.7 ± 0.05                               | 2.0 ± 0.1                                                      | 3.3 ± 0.2                                           | 2.5 ± 0.1                    | 1.1 ± 0.1                                                      | 2.7 ± 0.4                                           |
| 3      | 2.4 ± 0.02                 | 2.4 ± 0.1                                                   | 5.8 ± 0.3                                           | 2.4 ± 0.02                | 2.4 ± 0.1                                                   | 5.5 ± 0.3                                           | 2.4 ± 0.03                               | 2.3 ± 0.1                                                      | 5.5 ± 0.3                                           | 3.6 ± 0.1                    | 1.7 ± 0.2                                                      | 6.2 ± 0.7                                           |
| 4      | 2.7 ± 0.01                 | 2.6 ± 0.1                                                   | 7.1 ± 0.4                                           | 2.7 ± 0.01                | 2.6 ± 0.1                                                   | 6.9 ± 0.3                                           | 2.7 ± 0.03                               | 2.6 ± 0.1                                                      | 7.1 ± 0.2                                           | 4.1 ± 0.04                   | 1.5 ± 0.2                                                      | 6.2 ± 0.7                                           |
| 5      | 2.9 ± 0.01                 | 2.8 ± 0.1                                                   | 8.2 ± 0.4                                           | 2.9 ± 0.02                | 2.8 ± 0.2                                                   | 8.1 ± 0.5                                           | 2.9 ± 0.01                               | 3.0 ± 0.3                                                      | 8.6 ± 0.8                                           | 4.4 ± 0.1                    | 1.6 ± 0.2                                                      | 6.8 ± 0.7                                           |
| 6      | 2.9 ± 0.01                 | 3.6 ± 0.2                                                   | 10.3 ± 0.7                                          | 2.9 ± 0.02                | 3.0 ± 0.2                                                   | 8.7 ± 0.6                                           | 2.9 ± 0.01                               | 3.3 ± 0.3                                                      | 9.7 ± 0.9                                           | 4.3 ± 0.1                    | 1.8 ± 0.4                                                      | 7.6 ± 1.7                                           |
| 8      | 3.1 ± 0.01                 | 3.7 ± 0.2                                                   | 11.7 ± 0.6                                          | 3.1 ± 0.02                | 3.3 ± 0.2                                                   | 10.1 ± 0.7                                          | 3.1 ± 0.01                               | 3.7 ± 0.4                                                      | 11.4 ± 1.2                                          | 4.7 ± 0.03                   | 2.2 ± 0.2                                                      | 10.2 ± 1.0                                          |
| 10     | 3.2 ± 0.01                 | 4.7 ± 0.2                                                   | 15.1 ± 0.7                                          | 3.2 ± 0.01                | 4.0 ± 0.3                                                   | 12.8 ± 0.8                                          | 3.2 ± 0.01                               | 4.4 ± 0.4                                                      | 14.2 ± 1.1                                          | 4.8 ± 0.05                   | 3.4 ± 0.4                                                      | 16.0 ± 1.7                                          |

Experimental conditions are 50 mM phosphate, pH 7.0, 10 °C. [D]<sub>50%</sub> and *m*-values were calculated by fitting data to a two state equation using equation 1 in Equilibrium data analysis (*SI Appendix*).  $\Delta G_{D-N}^{H_2O}$  were calculated using equation 2 in Equilibrium data analysis (*SI Appendix*). The errors reported are from the fitting of the experimental data.
