# Supplementary material
Source: PubMed Central journal article supplement (PMC2765091)
Supplement: 0907455106_ST2_PDF.pdf [file 0907455106_ST2_PDF.pdf]

**SI Table 2: Thermodynamic parameters for equilibrium unfolding of CTPRa proteins fit to the Ising Model.**

| Variables                | <sup>a</sup> $m_1$ | <sup>a</sup> $x_c$ | <sup>a</sup> $J$       | <sup>b</sup> $H$       | <sup>c</sup> $\Delta G_{0 \rightarrow 1}^{H_2O}$ (kcalmol <sup>-1</sup> )<br>(Stability of a helix) | <sup>c</sup> $\Delta G_{0 \rightarrow 2}^{H_2O}$ (kcalmol <sup>-1</sup> )<br>(Stability of a repeat) | <sup>c</sup> $\Delta G_{0 \rightarrow 3}^{H_2O}$ (kcalmol <sup>-1</sup> )<br>(Stability of 1.5 repeats) |
|--------------------------|--------------------|--------------------|------------------------|------------------------|-----------------------------------------------------------------------------------------------------|------------------------------------------------------------------------------------------------------|---------------------------------------------------------------------------------------------------------|
| Fluorescence using GuHCl | 0.7 ± 0.02         | 3.6 ± 0.02         | 1.7 ± 0.04             | 1.3 ± 0.04             | -2.6 ± 0.1                                                                                          | -1.0 ± 0.1                                                                                           | 0.5 ± 0.2                                                                                               |
| C.D. using GuHCl         | 0.8 ± 0.02         | 3.6 ± 0.02         | 1.9 ± 0.04             | 1.4 ± 0.04             | -2.4 ± 0.1                                                                                          | -1.0 ± 0.1                                                                                           | 0.5 ± 0.2                                                                                               |
| C.D. using Urea          | 0.4 ± 0.02         | 5.3 ± 0.05         | 1.5 ± 0.05             | 1.1 ± 0.05             | -2.2 ± 0.1                                                                                          | -0.9 ± 0.2                                                                                           | 0.3 ± 0.2                                                                                               |
| <sup>d</sup> Average     | -                  | -                  | 1.7 ± <sup>d</sup> 0.2 | 1.3 ± <sup>d</sup> 0.2 | -2.4 ± <sup>e</sup> 0.4                                                                             | -1.0 ± <sup>e</sup> 0.5                                                                              | 0.4 ± <sup>e</sup> 0.6                                                                                  |

The errors reported are from the fitting of the experimental data. <sup>a</sup>Obtained from global fit of equilibrium data using SI equation 4. <sup>b</sup>Calculated from  $H = 1/2 m_1(x - x_c)$ . <sup>c</sup>Calculated from SI equation 5. <sup>d</sup>Average obtained from CD (urea and GuHCl) and Fluorescence (GuHCl), errors are quoted as a standard deviation of all of the experiments. <sup>e</sup>Errors obtained through propagation of one standard deviation of the averaged H and J values.
