# Supplementary material
Source: PubMed Central journal article supplement (PMC2765091)
Supplement: 0907455106_ST3_PDF.pdf [file 0907455106_ST3_PDF.pdf]

**SI Table 3: Kinetic parameters from fitting chevron plots for CTPRa2 fit to a 2 state model and CTPRa3 to CTPRa10 proteins fit to 3 state sequential folding model.**

**CTPRa2 fit to a two state folding model**

| CTPRan | $k_F^{H_2O}$ (s <sup>-1</sup> ) | $m_{\ddagger-U}$ (M <sup>-1</sup> ) | $k_U^{H_2O}$ (s <sup>-1</sup> ) | $m_{\ddagger-F}$ (M <sup>-1</sup> ) | <sup>a</sup> $\Delta G_{U-F}^{H_2O}$ (kcal mol <sup>-1</sup> ) |
|--------|---------------------------------|-------------------------------------|---------------------------------|-------------------------------------|----------------------------------------------------------------|
| 2      | 2080 ± 400                      | 2.1 ± 0.2                           | 14 ± 4                          | 1.2 ± 0.1                           | 2.8 ± 0.4                                                      |

**CTPRa3 to CTPRa10 proteins fit to 3 state sequential folding model**

| CTPRan | $k_{UI}$ (s <sup>-1</sup> )                   | $m_{UI}$ (M <sup>-1</sup> ) | $k_{IU}$ (s <sup>-1</sup> ) | $m_{IU}$ (M <sup>-1</sup> ) | $k_{IN}$ (s <sup>-1</sup> ) | $m_{IN}$ (M <sup>-1</sup> ) | $k_{NI}$ (s <sup>-1</sup> )                       | $m_{NI}$ (M <sup>-1</sup> ) | <sup>b</sup> $\Delta G_{U-N}^{H_2O}$ (kcal mol <sup>-1</sup> ) |
|--------|-----------------------------------------------|-----------------------------|-----------------------------|-----------------------------|-----------------------------|-----------------------------|---------------------------------------------------|-----------------------------|----------------------------------------------------------------|
| 3      | 1.8 × 10 <sup>4</sup> ± 2.4 × 10 <sup>4</sup> | -2.3 ± 0.6                  | 14 ± 9                      | 1.0 ± 0.2                   | 490 ± 48                    | -0.6 ± 0.1                  | 0.06 ± 0.09                                       | 2.9 ± 0.6                   | 9.1 ± 2.1                                                      |
| 4      | 2.6 × 10 <sup>4</sup> ± 2.9 × 10 <sup>4</sup> | -2.3 ± 0.4                  | 28 ± 24                     | 0.6 ± 0.2                   | 275 ± 15                    | -0.2 ± 0.1                  | 0.007 ± 0.01                                      | 3.2 ± 0.6                   | 9.8 ± 2.2                                                      |
| 5      | 7700 ± 5700                                   | -1.9 ± 0.3                  | 5 ± 4                       | 1.0 ± 0.2                   | 210 ± 9                     | -0.1 ± 0.05                 | 0.002 ± 0.01                                      | 3.5 ± 0.8                   | 10.6 ± 2.7                                                     |
| 6      | 1.3 × 10 <sup>4</sup> ± 6500                  | -2.1 ± 0.2                  | 6 ± 2                       | 0.9 ± 0.1                   | 220 ± 9                     | -0.2 ± 0.04                 | 1.2 × 10 <sup>-6</sup> ± 3.1 × 10 <sup>-6</sup>   | 5.6 ± 0.8                   | 15.0 ± 2.6                                                     |
| 8      | 3800 ± 850                                    | -1.5 ± 0.1                  | 3.0 ± 0.6                   | 1.0 ± 0.04                  | 190 ± 6                     | -0.03 ± 0.04                | 9.9 × 10 <sup>-10</sup> ± 2.6 × 10 <sup>-9</sup>  | 7.3 ± 0.7                   | 18.6 ± 2.6                                                     |
| 10     | 6400 ± 1800                                   | -1.7 ± 0.1                  | 2.9 ± 0.6                   | 0.9 ± 0.04                  | 150 ± 6                     | 0.04 ± 0.04                 | 2.6 × 10 <sup>-12</sup> ± 9.5 × 10 <sup>-12</sup> | 9.0 ± 1.0                   | 22.2 ± 3.7                                                     |

The errors reported are from the fitting of the experimental data. Data fitted to either two or three state on pathway model as per *SI Appendix*. <sup>a</sup>Calculated from  $\Delta G_{U-F}^{H_2O} = -RT \ln(k_U^{H_2O}/k_F^{H_2O})$ . <sup>b</sup>Calculated from  $\Delta G_{U-N}^{H_2O} = -RT \ln(k_{IU}^{H_2O}k_{NI}^{H_2O}/k_{UI}^{H_2O}k_{IN}^{H_2O})$ .
