# Supplementary material
Source: PubMed Central journal article supplement (PMC2765091)
Supplement: 0907455106_ST4_PDF.pdf [file 0907455106_ST4_PDF.pdf]

**SI Table 4: Comparison of Rate Constants of folding at 0.54 M GuHCl monitored by intrinsic fluorescence and ANS fluorescence.**

| CTPRan | <sup>a</sup> <i>k</i> Intrinsic Fluorescence (s <sup>-1</sup> ) | <sup>b</sup> <i>k</i> ANS Fluorescence (s <sup>-1</sup> ) |
|--------|-----------------------------------------------------------------|-----------------------------------------------------------|
| 2      | <sup>c</sup> 450 ± 50                                           | No observed binding to ANS                                |
| 3      | 350 ± 40                                                        | No observed binding to ANS                                |
| 4      | 220 ± 23                                                        | 162 ± 44                                                  |
| 5      | 180 ± 14                                                        | 151 ± 13                                                  |
| 6      | 180 ± 12                                                        | 156 ± 24                                                  |
| 8      | 170 ± 14                                                        | 143 ± 34                                                  |
| 10     | 140 ± 5                                                         | 123 ± 14                                                  |

All rate constants were determined from refolding traces that had a final concentration 0.54 M GuHCl except CTPRa2 (0.73 M). <sup>a</sup>Monitored by intrinsic fluorescence which were fitted to a single exponential equation. <sup>b</sup>Monitored by ANS fluorescence which were fitted to a double exponential equation. The *k* listed is the faster rate with larger amplitude. The second phase was due to photolysis as decreasing protein concentration decreased the first phase but not the second (data not shown). <sup>c</sup>Rate constant monitored at 0.73 M GuHCl as 0.54 M was too rapid for the stopped flow instrument. Errors reported are ± 1 standard deviation of the experimental data.
