# Supplementary material
Source: PubMed Central journal article supplement (PMC2765091)
Supplement: 0907455106_ST5_PDF.pdf [file 0907455106_ST5_PDF.pdf]

**SI Table 5: Kinetic parameters for CTPRa8 and CTPRa10 proteins chevrons fit to 3 state off pathway folding model.**

| CTPRan | <sup>a</sup> ln $k_N$ | <sup>a</sup> $m_N$ (M <sup>-1</sup> ) | <sup>a</sup> ln $K_I$ | <sup>a</sup> $m_{KI}$ (M <sup>-1</sup> ) |
|--------|-----------------------|---------------------------------------|-----------------------|------------------------------------------|
| 8      | 9.9 ± 0.3             | -2.1 ± 0.1                            | 4.7 ± 0.3             | -2.2 ± 8 × 10 <sup>-2</sup>              |
| 10     | 10.6 ± 0.4            | -2.4 ± 0.1                            | 5.6 ± 0.4             | -2.5 ± 1 × 10 <sup>-1</sup>              |

Data were obtained by fitting refolding data over 0 - 3.2 M GuHCl using eq. 12 (*SI Appendix*). <sup>a</sup>The errors reported are from the fitting of the experimental data.
